# Supplementary material
Source: Research Square preprint supplement (doi:10.21203/rs.3.rs-9027741/v1)
Supplement: Supplementary file 1 [file 391a83619b90131ce7ae06ca.pdf]

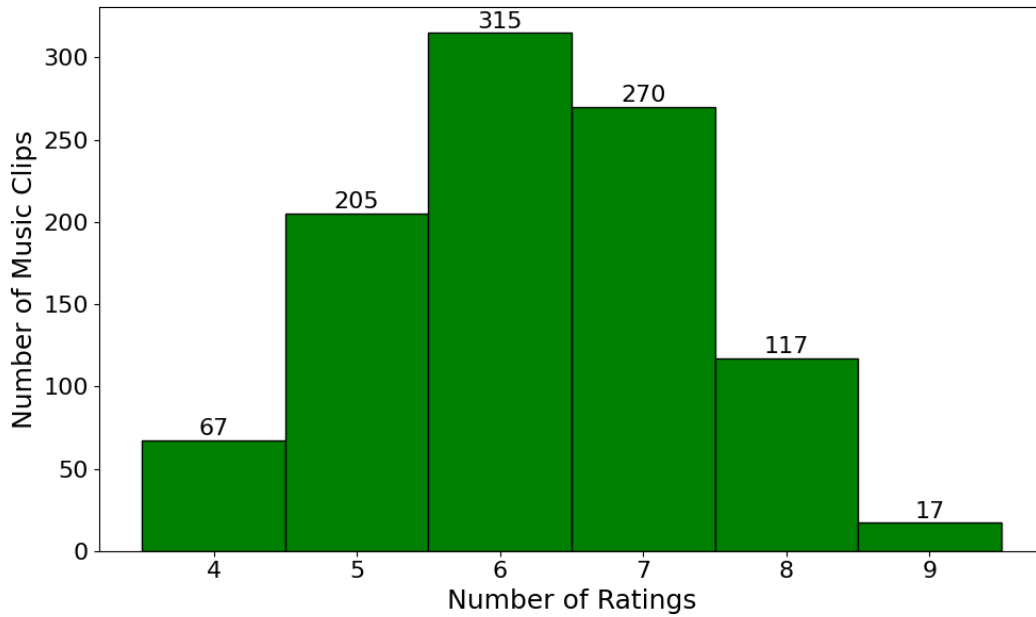

**Figure S1.** Distribution of the number of ratings per clip in AI music clips.

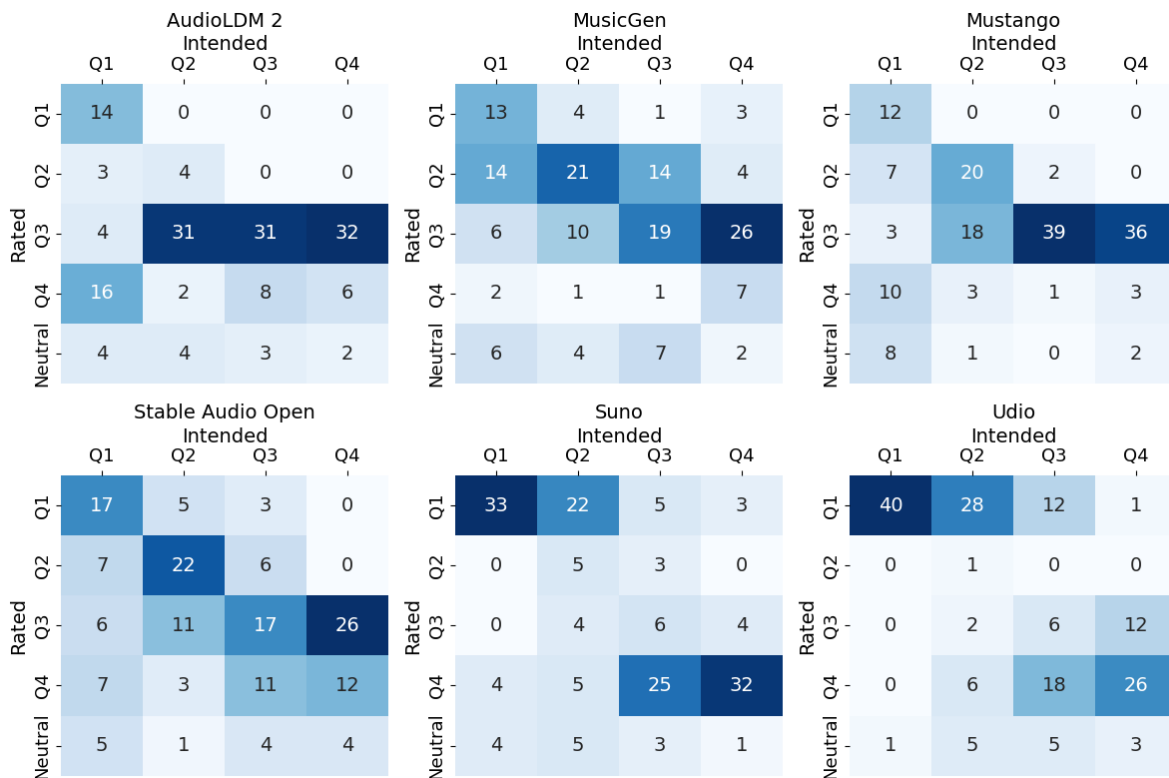

**Figure S2.** Confusion matrices by TTM system for quadrant-level emotion classification in the valence–arousal (VA) space (Q1: high valence–high arousal; Q2: low valence–high arousal; Q3: low valence–low arousal; Q4: high valence–low arousal). Clips with a mean valence or arousal rating exactly equal to 5.0 (the decision boundary between the quadrants) were categorized as “Neutral.”

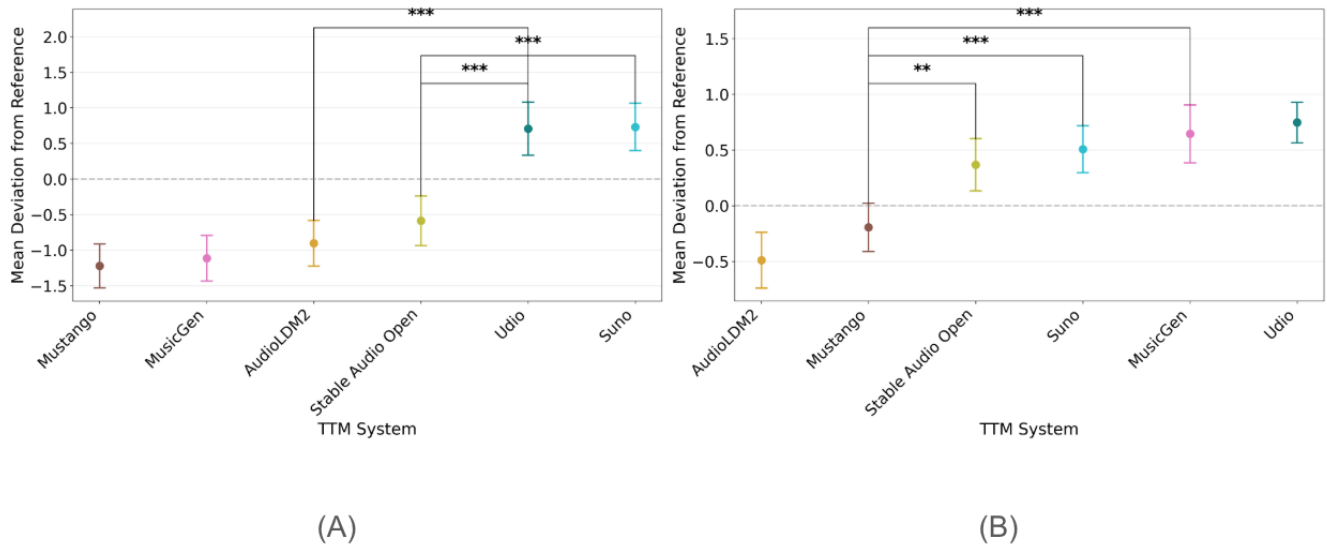

**Figure S3.** Mean deviation plots for each TTM system with 95% confidence intervals. Among all pairs with statistically significant differences, the three smallest differences are indicated. (\* $p < .05$ , \*\* $p < .01$ , \*\*\* $p < .001$ .) (A) Mean valence deviations. (B) Mean arousal deviations.

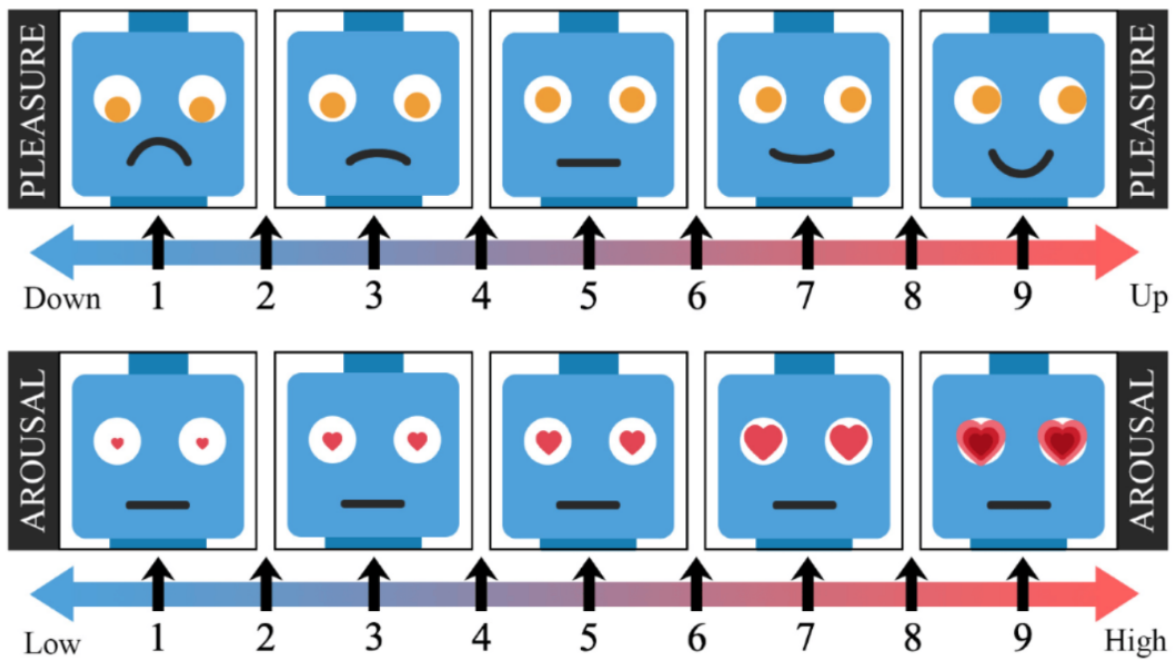

**Figure S4.** Self-Assessment Manikin (SAM) scale images<sup>1</sup> shown alongside the valence (top) and arousal (bottom) rating questions in the online survey.

**Table S1.** Overall and quadrant-wise summary statistics for valence and arousal ratings of clips in AImoclips.

| Quadrant | Valence |       | Arousal |       | <i>n</i> |
|----------|---------|-------|---------|-------|----------|
|          | Mean    | Std   | Mean    | Std   |          |
| Overall  | 4.854   | 1.351 | 4.618   | 1.472 | 991      |
| Q1       | 5.674   | 1.086 | 5.692   | 1.085 | 246      |
| Q2       | 4.388   | 1.468 | 5.325   | 1.405 | 248      |
| Q3       | 4.591   | 1.288 | 4.028   | 1.163 | 250      |
| Q4       | 4.771   | 1.166 | 3.436   | 0.882 | 247      |

**Table S2.** Summary statistics of Euclidean distances between rated scores and reference scores, by quadrant.

| Quadrant | Mean  | Std   | <i>n</i> |
|----------|-------|-------|----------|
| Q1       | 2.654 | 1.092 | 246      |
| Q2       | 2.326 | 1.072 | 248      |
| Q3       | 2.603 | 1.174 | 250      |
| Q4       | 2.836 | 1.017 | 247      |

**Table S3.** Summary statistics of valence and arousal deviations from reference scores, by TTM system.

| TTM System        | Valence        |                | Arousal        |                | <i>n</i> |
|-------------------|----------------|----------------|----------------|----------------|----------|
|                   | Mean Deviation | Standard Error | Mean Deviation | Standard Error |          |
| AudioLDM 2        | -0.903         | 0.162          | -0.490         | 0.127          | 164      |
| MusicGen          | -1.115         | 0.163          | 0.644          | 0.131          | 165      |
| Mustango          | -1.223         | 0.157          | -0.196         | 0.110          | 165      |
| Stable Audio Open | -0.588         | 0.177          | 0.366          | 0.119          | 167      |
| Suno              | 0.730          | 0.168          | 0.505          | 0.107          | 164      |
| Udio              | 0.707          | 0.189          | 0.746          | 0.092          | 166      |

**Table S4.** Summary statistics of Euclidean distances between rated scores (or reference scores) and the center of the valence–arousal plane ( $v = 5, a = 5$ ), by TTM system.  $t$  and  $p$  denote the test statistic and  $p$ -value from two-sample  $t$ -tests comparing each system’s clip ratings with the reference score set across all emotion intents.

| TTM System        | Mean  | Std   | $t$     | $p$   |
|-------------------|-------|-------|---------|-------|
| Overall           | 1.857 | 0.840 | -37.178 | <.001 |
| AudioLDM 2        | 1.843 | 0.792 | -14.559 | <.001 |
| MusicGen          | 1.767 | 0.808 | -15.509 | <.001 |
| Mustango          | 1.882 | 0.958 | -13.490 | <.001 |
| Stable Audio Open | 1.560 | 0.771 | -19.449 | <.001 |
| Suno              | 2.118 | 0.792 | -13.443 | <.001 |
| Udio              | 1.979 | 0.809 | -16.408 | <.001 |
| Reference Scores  | 3.051 | 0.599 | -       | -     |

**Table S5.** Summary statistics for valence and arousal ratings, by TTM system and quadrant.

| TTM System        | Quadrant | Valence |       | Arousal |       | <i>n</i> |
|-------------------|----------|---------|-------|---------|-------|----------|
|                   |          | Mean    | Std   | Mean    | Std   |          |
| AudioLDM 2        | Overall  | 4.339   | 1.160 | 3.875   | 0.992 | 41       |
|                   | Q1       | 5.496   | 0.801 | 4.805   | 0.804 | 41       |
|                   | Q2       | 3.391   | 1.021 | 3.962   | 1.046 | 41       |
|                   | Q3       | 4.363   | 0.813 | 3.497   | 0.603 | 42       |
|                   | Q4       | 4.099   | 0.888 | 3.227   | 0.668 | 40       |
| MusicGen          | Overall  | 4.157   | 1.167 | 4.971   | 1.309 | 41       |
|                   | Q1       | 4.856   | 1.238 | 5.625   | 1.035 | 41       |
|                   | Q2       | 3.757   | 1.235 | 5.635   | 1.145 | 40       |
|                   | Q3       | 3.579   | 0.942 | 4.665   | 1.243 | 42       |
|                   | Q4       | 4.432   | 0.744 | 4.004   | 1.052 | 42       |
| Mustango          | Overall  | 3.997   | 1.073 | 4.156   | 1.264 | 41       |
|                   | Q1       | 5.161   | 0.577 | 5.217   | 0.701 | 40       |
|                   | Q2       | 3.493   | 1.019 | 4.878   | 1.214 | 42       |
|                   | Q3       | 3.500   | 0.826 | 3.284   | 0.874 | 42       |
|                   | Q4       | 3.885   | 0.859 | 3.273   | 0.712 | 41       |
| Stable Audio Open | Overall  | 4.690   | 1.087 | 4.733   | 1.302 | 41       |
|                   | Q1       | 5.329   | 0.987 | 5.385   | 0.877 | 42       |
|                   | Q2       | 4.166   | 1.085 | 5.605   | 1.332 | 42       |
|                   | Q3       | 4.674   | 1.102 | 4.576   | 0.743 | 41       |
|                   | Q4       | 4.588   | 0.858 | 3.363   | 0.785 | 42       |
| Suno              | Overall  | 5.967   | 1.015 | 4.867   | 1.776 | 41       |
|                   | Q1       | 6.676   | 0.676 | 6.469   | 1.070 | 41       |
|                   | Q2       | 5.504   | 1.159 | 5.873   | 1.437 | 41       |
|                   | Q3       | 5.648   | 0.937 | 3.757   | 1.242 | 42       |
|                   | Q4       | 6.047   | 0.817 | 3.357   | 0.913 | 40       |
| Udio              | Overall  | 5.974   | 0.957 | 5.100   | 1.648 | 41       |
|                   | Q1       | 6.519   | 0.633 | 6.646   | 0.626 | 41       |
|                   | Q2       | 5.991   | 0.929 | 5.993   | 1.150 | 42       |
|                   | Q3       | 5.812   | 0.920 | 4.409   | 1.307 | 41       |
|                   | Q4       | 5.583   | 1.061 | 3.372   | 0.906 | 42       |

## References

1. He, X. & Song, N. Emotional value in online education: A framework for service touchpoint assessment. *Sustainability* **15**, DOI: [10.3390/su15064772](https://doi.org/10.3390/su15064772) (2023).
